# Supplementary material
Source: publisher figshare collection journal article supplement (https://acs.figshare.com/ndownloader/files/5336260)
Supplement: Supplementary file 1 [file 5336260]

 

data_vic0609 

  

_audit_creation_method            SHELXL-97 

_chemical_name_systematic 

; 

 ? 

; 

_chemical_name_common             ? 

_chemical_melting_point           ? 

_chemical_formula_moiety          'C16 H15 N5 O2' 

_chemical_formula_sum             'C16 H15 N5 O2' 

_chemical_formula_weight          309.33 

  

loop_ 

 _atom_type_symbol 

 _atom_type_description 

 _atom_type_scat_dispersion_real 

 _atom_type_scat_dispersion_imag 

 _atom_type_scat_source 

 'C'  'C'   0.0033   0.0016 

 'International Tables Vol C Tables 4.2.6.8 and 6.1.1.4' 

 'H'  'H'   0.0000   0.0000 

 'International Tables Vol C Tables 4.2.6.8 and 6.1.1.4' 

 'N'  'N'   0.0061   0.0033 

 'International Tables Vol C Tables 4.2.6.8 and 6.1.1.4' 

 'O'  'O'   0.0106   0.0060 

 'International Tables Vol C Tables 4.2.6.8 and 6.1.1.4' 

  

_symmetry_cell_setting            Triclinic 

_symmetry_space_group_name_H-M    'P -1' 

_symmetry_space_group_name_Hall   '-P 1' 

  

loop_ 

 _symmetry_equiv_pos_as_xyz 

 'x, y, z' 

 '-x, -y, -z' 

  

_cell_length_a                    7.1822(9) 

_cell_length_b                    10.8832(14) 

_cell_length_c                    11.6087(12) 

_cell_angle_alpha                 62.139(9) 

_cell_angle_beta                  74.242(8) 

_cell_angle_gamma                 72.220(9) 

_cell_volume                      754.90(16) 

_cell_formula_units_Z             2 

_cell_measurement_temperature     193(2) 

_cell_measurement_reflns_used     36 

_cell_measurement_theta_min       10.19 

_cell_measurement_theta_max       12.51 

  

_exptl_crystal_description        prism 

_exptl_crystal_colour             red 

_exptl_crystal_size_max           0.52 

_exptl_crystal_size_mid           0.20 

_exptl_crystal_size_min           0.10 

_exptl_crystal_density_meas       0 

_exptl_crystal_density_diffrn     1.361 

_exptl_crystal_density_method     'not measured' 

_exptl_crystal_F_000              324 

_exptl_absorpt_coefficient_mu     0.094 

_exptl_absorpt_correction_type    integration 

_exptl_absorpt_correction_T_min   0.9525 

_exptl_absorpt_correction_T_max   0.9906 

_exptl_absorpt_process_details    'Bruker SHELXTL'

  

_exptl_special_details 

; 

 ? 

; 

  

_diffrn_ambient_temperature       193(2) 

_diffrn_radiation_wavelength      0.71073 

_diffrn_radiation_type            MoK\a 

_diffrn_radiation_source          'fine-focus rotating anode' 

_diffrn_radiation_monochromator   graphite 

_diffrn_measurement_device_type   'Bruker P4/RA' 

_diffrn_measurement_method        '2\q/\w scans' 

_diffrn_standards_number          3 

_diffrn_standards_interval_count  297 

_diffrn_standards_decay_%         0 

_diffrn_reflns_number             2771 

_diffrn_reflns_av_R_equivalents   0.0303 

_diffrn_reflns_av_sigmaI/netI     0.0516 

_diffrn_reflns_limit_h_min        -8 

_diffrn_reflns_limit_h_max        0 

_diffrn_reflns_limit_k_min        -11 

_diffrn_reflns_limit_k_max        11 

_diffrn_reflns_limit_l_min        -13 

_diffrn_reflns_limit_l_max        13 

_diffrn_reflns_theta_min          2.01 

_diffrn_reflns_theta_max          25.00 

_reflns_number_total              2571 

_reflns_number_gt                 1734 

_reflns_threshold_expression      I>2\s(I) 

  

_computing_data_collection        'Bruker XSCANS' 

_computing_cell_refinement        'Bruker XSCANS' 

_computing_data_reduction         'Bruker SHELXTL' 

_computing_structure_solution     'SHELXS-97 (Sheldrick, 1990)' 

_computing_structure_refinement   'SHELXL-97 (Sheldrick, 1997)' 

_computing_molecular_graphics     'Bruker SHELXTL' 

_computing_publication_material   'Bruker SHELXTL' 

  

_refine_special_details 

; 

 Refinement of F^2^ against ALL reflections.  The weighted R-factor wR and 

 goodness of fit S are based on F^2^, conventional R-factors R are based 

 on F, with F set to zero for negative F^2^. The threshold expression of 

 F^2^ > 2sigma(F^2^) is used only for calculating R-factors(gt) etc. and is 

 not relevant to the choice of reflections for refinement.  R-factors based 

 on F^2^ are statistically about twice as large as those based on F, and R- 

 factors based on ALL data will be even larger. 

; 

  

_refine_ls_structure_factor_coef  Fsqd 

_refine_ls_matrix_type            full 

_refine_ls_weighting_scheme       calc 

_refine_ls_weighting_details 

 'calc w=1/[\s^2^(Fo^2^)+(0.0980P)^2^+0.0800P] where P=(Fo^2^+2Fc^2^)/3' 

_atom_sites_solution_primary      direct 

_atom_sites_solution_secondary    difmap 

_atom_sites_solution_hydrogens    geom 

_refine_ls_hydrogen_treatment     constr

_refine_ls_extinction_method      none 

_refine_ls_extinction_coef        ? 

_refine_ls_number_reflns          2571 

_refine_ls_number_parameters      210 

_refine_ls_number_restraints      0 

_refine_ls_R_factor_all           0.0996 

_refine_ls_R_factor_gt            0.0644 

_refine_ls_wR_factor_ref          0.1829 

_refine_ls_wR_factor_gt           0.1547 

_refine_ls_goodness_of_fit_ref    1.039 

_refine_ls_restrained_S_all       1.039 

_refine_ls_shift/su_max           0.000 

_refine_ls_shift/su_mean          0.000 

  

loop_ 

 _atom_site_label 

 _atom_site_type_symbol 

 _atom_site_fract_x 

 _atom_site_fract_y 

 _atom_site_fract_z 

 _atom_site_U_iso_or_equiv 

 _atom_site_adp_type 

 _atom_site_occupancy 

 _atom_site_symmetry_multiplicity 

 _atom_site_calc_flag 

 _atom_site_refinement_flags 

 _atom_site_disorder_assembly 

 _atom_site_disorder_group 

O1 O 0.1269(3) 0.1273(2) 0.13220(19) 0.0408(6) Uani 1 1 d . . . 

O2 O 0.2701(3) 0.2732(2) 0.27401(19) 0.0422(6) Uani 1 1 d . . . 

N1 N 0.2569(4) -0.2086(2) 0.4542(2) 0.0331(6) Uani 1 1 d . . . 

N2 N 0.2511(4) -0.0946(2) 0.3453(2) 0.0326(6) Uani 1 1 d . . . 

H2N H 0.2275 -0.0100 0.3444 0.039 Uiso 1 1 calc R . . 

N3 N 0.2383(3) -0.0815(2) 0.5881(2) 0.0326(6) Uani 1 1 d . . . 

N4 N 0.2328(3) 0.0390(2) 0.4852(2) 0.0304(6) Uani 1 1 d . . . 

N5 N 0.2432(4) -0.4311(3) 0.7760(3) 0.0530(8) Uani 1 1 d . . . 

C1 C 0.2437(4) -0.1942(3) 0.5662(3) 0.0324(7) Uani 1 1 d . . . 

C2 C 0.2433(5) -0.3263(3) 0.6836(3) 0.0373(8) Uani 1 1 d . . . 

C11 C 0.2844(4) -0.1124(3) 0.2278(3) 0.0306(7) Uani 1 1 d . . . 

C12 C 0.2212(4) 0.0064(3) 0.1159(3) 0.0314(7) Uani 1 1 d . . . 

C13 C 0.2583(4) -0.0056(3) -0.0037(3) 0.0363(8) Uani 1 1 d . . . 

H13 H 0.2162 0.0740 -0.0807 0.044 Uiso 1 1 calc R . . 

C14 C 0.3564(5) -0.1341(3) -0.0090(3) 0.0386(8) Uani 1 1 d . . . 

H14 H 0.3838 -0.1417 -0.0905 0.046 Uiso 1 1 calc R . . 

C15 C 0.4151(5) -0.2513(3) 0.1020(3) 0.0395(8) Uani 1 1 d . . . 

H15 H 0.4801 -0.3393 0.0970 0.047 Uiso 1 1 calc R . . 

C16 C 0.3793(4) -0.2411(3) 0.2209(3) 0.0349(7) Uani 1 1 d . . . 

H16 H 0.4198 -0.3219 0.2975 0.042 Uiso 1 1 calc R . . 

C17 C 0.0551(5) 0.2495(3) 0.0217(3) 0.0406(8) Uani 1 1 d . . . 

H17A H 0.1668 0.2803 -0.0472 0.049 Uiso 1 1 calc R . . 

H17B H -0.0175 0.3263 0.0488 0.049 Uiso 1 1 calc R . . 

H17C H -0.0335 0.2261 -0.0127 0.049 Uiso 1 1 calc R . . 

C21 C 0.2343(4) 0.1576(3) 0.5036(3) 0.0301(7) Uani 1 1 d . . . 

C22 C 0.2519(4) 0.2829(3) 0.3898(3) 0.0318(7) Uani 1 1 d . . . 

C23 C 0.2499(4) 0.4054(3) 0.3994(3) 0.0358(8) Uani 1 1 d . . . 

H23 H 0.2610 0.4908 0.3222 0.043 Uiso 1 1 calc R . . 

C24 C 0.2314(5) 0.4023(3) 0.5227(3) 0.0389(8) Uani 1 1 d . . . 

H24 H 0.2320 0.4858 0.5296 0.047 Uiso 1 1 calc R . . 

C25 C 0.2121(5) 0.2794(4) 0.6354(3) 0.0427(8) Uani 1 1 d . . . 

H25 H 0.1967 0.2794 0.7193 0.051 Uiso 1 1 calc R . . 

C26 C 0.2148(4) 0.1572(3) 0.6276(3) 0.0379(8) Uani 1 1 d . . . 

H26 H 0.2037 0.0724 0.7056 0.046 Uiso 1 1 calc R . . 

C27 C 0.2830(5) 0.3990(3) 0.1554(3) 0.0464(9) Uani 1 1 d . . . 

H27A H 0.1677 0.4742 0.1601 0.056 Uiso 1 1 calc R . . 

H27B H 0.2859 0.3798 0.0804 0.056 Uiso 1 1 calc R . . 

H27C H 0.4041 0.4297 0.1441 0.056 Uiso 1 1 calc R . . 

  

loop_ 

 _atom_site_aniso_label 

 _atom_site_aniso_U_11 

 _atom_site_aniso_U_22 

 _atom_site_aniso_U_33 

 _atom_site_aniso_U_23 

 _atom_site_aniso_U_13 

 _atom_site_aniso_U_12 

O1 0.0565(15) 0.0290(12) 0.0284(12) -0.0091(9) -0.0116(10) 0.0020(10) 

O2 0.0678(16) 0.0317(12) 0.0271(11) -0.0105(10) -0.0067(10) -0.0141(11) 

N1 0.0344(14) 0.0292(14) 0.0276(14) -0.0046(11) -0.0055(11) -0.0074(11) 

N2 0.0397(15) 0.0246(13) 0.0296(14) -0.0092(11) -0.0051(11) -0.0055(11) 

N3 0.0331(14) 0.0268(14) 0.0300(14) -0.0066(11) -0.0053(11) -0.0042(11) 

N4 0.0333(14) 0.0252(13) 0.0278(13) -0.0075(11) -0.0068(11) -0.0036(10) 

N5 0.059(2) 0.0356(17) 0.0375(16) 0.0012(14) -0.0043(14) -0.0034(14) 

C1 0.0314(17) 0.0284(17) 0.0265(16) -0.0041(13) -0.0038(13) -0.0044(13) 

C2 0.0386(19) 0.0333(18) 0.0336(18) -0.0116(15) -0.0071(14) -0.0016(14) 

C11 0.0311(16) 0.0320(17) 0.0299(16) -0.0127(13) -0.0031(13) -0.0101(13) 

C12 0.0344(17) 0.0306(17) 0.0301(16) -0.0128(13) -0.0043(13) -0.0084(13) 

C13 0.0423(19) 0.0369(18) 0.0289(16) -0.0098(14) -0.0102(14) -0.0094(14) 

C14 0.047(2) 0.0407(19) 0.0359(18) -0.0200(15) -0.0042(15) -0.0152(15) 

C15 0.046(2) 0.0352(18) 0.0443(19) -0.0217(16) -0.0035(15) -0.0119(15) 

C16 0.0403(18) 0.0290(17) 0.0350(17) -0.0103(14) -0.0066(14) -0.0114(14) 

C17 0.047(2) 0.0283(17) 0.0382(18) -0.0082(14) -0.0158(15) 0.0012(14) 

C21 0.0304(16) 0.0297(17) 0.0292(16) -0.0129(13) -0.0077(13) -0.0013(13) 

C22 0.0352(17) 0.0327(17) 0.0268(16) -0.0126(13) -0.0080(13) -0.0030(13) 

C23 0.0402(18) 0.0286(17) 0.0359(18) -0.0111(14) -0.0061(14) -0.0074(14) 

C24 0.044(2) 0.0360(19) 0.0427(19) -0.0221(16) -0.0075(15) -0.0064(15) 

C25 0.053(2) 0.048(2) 0.0323(18) -0.0217(16) -0.0078(16) -0.0085(16) 

C26 0.0417(19) 0.0382(19) 0.0291(17) -0.0094(14) -0.0068(14) -0.0086(15) 

C27 0.071(2) 0.042(2) 0.0261(17) -0.0083(15) -0.0072(16) -0.0210(17) 

  

_geom_special_details 

; 

 All esds (except the esd in the dihedral angle between two l.s. planes) 

 are estimated using the full covariance matrix.  The cell esds are taken 

 into account individually in the estimation of esds in distances, angles 

 and torsion angles; correlations between esds in cell parameters are only 

 used when they are defined by crystal symmetry.  An approximate (isotropic) 

 treatment of cell esds is used for estimating esds involving l.s. planes. 

; 

  

loop_ 

 _geom_bond_atom_site_label_1 

 _geom_bond_atom_site_label_2 

 _geom_bond_distance 

 _geom_bond_site_symmetry_2 

 _geom_bond_publ_flag 

O1 C12 1.358(3) . ? 

O1 C17 1.424(3) . ? 

O2 C22 1.366(3) . ? 

O2 C27 1.423(3) . ? 

N1 N2 1.292(3) . ? 

N1 C1 1.355(4) . ? 

N2 C11 1.413(4) . ? 

N3 N4 1.296(3) . ? 

N3 C1 1.353(4) . ? 

N4 C21 1.406(4) . ? 

N5 C2 1.144(4) . ? 

C1 C2 1.447(4) . ? 

C11 C16 1.387(4) . ? 

C11 C12 1.399(4) . ? 

C12 C13 1.402(4) . ? 

C13 C14 1.383(4) . ? 

C14 C15 1.377(4) . ? 

C15 C16 1.385(4) . ? 

C21 C22 1.397(4) . ? 

C21 C26 1.406(4) . ? 

C22 C23 1.383(4) . ? 

C23 C24 1.387(4) . ? 

C24 C25 1.379(4) . ? 

C25 C26 1.369(4) . ? 

  

loop_ 

 _geom_angle_atom_site_label_1 

 _geom_angle_atom_site_label_2 

 _geom_angle_atom_site_label_3 

 _geom_angle 

 _geom_angle_site_symmetry_1 

 _geom_angle_site_symmetry_3 

 _geom_angle_publ_flag 

C12 O1 C17 118.2(2) . . ? 

C22 O2 C27 117.4(2) . . ? 

N2 N1 C1 117.3(3) . . ? 

N1 N2 C11 116.9(2) . . ? 

N4 N3 C1 115.5(2) . . ? 

N3 N4 C21 117.1(2) . . ? 

N3 C1 N1 132.3(3) . . ? 

N3 C1 C2 114.3(3) . . ? 

N1 C1 C2 113.4(3) . . ? 

N5 C2 C1 179.6(3) . . ? 

C16 C11 C12 120.4(3) . . ? 

C16 C11 N2 122.1(3) . . ? 

C12 C11 N2 117.5(3) . . ? 

O1 C12 C11 116.4(3) . . ? 

O1 C12 C13 124.5(3) . . ? 

C11 C12 C13 119.1(3) . . ? 

C14 C13 C12 119.5(3) . . ? 

C15 C14 C13 121.0(3) . . ? 

C14 C15 C16 120.1(3) . . ? 

C15 C16 C11 119.8(3) . . ? 

C22 C21 C26 119.4(3) . . ? 

C22 C21 N4 116.5(3) . . ? 

C26 C21 N4 124.1(3) . . ? 

O2 C22 C23 124.6(3) . . ? 

O2 C22 C21 115.2(3) . . ? 

C23 C22 C21 120.2(3) . . ? 

C22 C23 C24 119.5(3) . . ? 

C25 C24 C23 120.7(3) . . ? 

C26 C25 C24 120.6(3) . . ? 

C25 C26 C21 119.7(3) . . ? 

  

loop_ 

 _geom_torsion_atom_site_label_1 

 _geom_torsion_atom_site_label_2 

 _geom_torsion_atom_site_label_3 

 _geom_torsion_atom_site_label_4 

 _geom_torsion 

 _geom_torsion_site_symmetry_1 

 _geom_torsion_site_symmetry_2 

 _geom_torsion_site_symmetry_3 

 _geom_torsion_site_symmetry_4 

 _geom_torsion_publ_flag 

C1 N1 N2 C11 174.0(2) . . . . ? 

C1 N3 N4 C21 -177.8(2) . . . . ? 

N4 N3 C1 N1 4.8(5) . . . . ? 

N4 N3 C1 C2 -178.1(2) . . . . ? 

N2 N1 C1 N3 -5.3(5) . . . . ? 

N2 N1 C1 C2 177.6(2) . . . . ? 

N3 C1 C2 N5 -164(100) . . . . ? 

N1 C1 C2 N5 14(58) . . . . ? 

N1 N2 C11 C16 -20.2(4) . . . . ? 

N1 N2 C11 C12 161.1(2) . . . . ? 

C17 O1 C12 C11 -178.2(3) . . . . ? 

C17 O1 C12 C13 1.9(4) . . . . ? 

C16 C11 C12 O1 179.0(3) . . . . ? 

N2 C11 C12 O1 -2.3(4) . . . . ? 

C16 C11 C12 C13 -1.1(4) . . . . ? 

N2 C11 C12 C13 177.6(3) . . . . ? 

O1 C12 C13 C14 179.8(3) . . . . ? 

C11 C12 C13 C14 -0.1(4) . . . . ? 

C12 C13 C14 C15 1.2(5) . . . . ? 

C13 C14 C15 C16 -1.2(5) . . . . ? 

C14 C15 C16 C11 0.0(5) . . . . ? 

C12 C11 C16 C15 1.2(4) . . . . ? 

N2 C11 C16 C15 -177.5(3) . . . . ? 

N3 N4 C21 C22 172.7(3) . . . . ? 

N3 N4 C21 C26 -8.8(4) . . . . ? 

C27 O2 C22 C23 -1.6(5) . . . . ? 

C27 O2 C22 C21 178.3(3) . . . . ? 

C26 C21 C22 O2 -180.0(3) . . . . ? 

N4 C21 C22 O2 -1.4(4) . . . . ? 

C26 C21 C22 C23 -0.1(4) . . . . ? 

N4 C21 C22 C23 178.5(3) . . . . ? 

O2 C22 C23 C24 -179.7(3) . . . . ? 

C21 C22 C23 C24 0.4(5) . . . . ? 

C22 C23 C24 C25 -1.0(5) . . . . ? 

C23 C24 C25 C26 1.3(5) . . . . ? 

C24 C25 C26 C21 -1.1(5) . . . . ? 

C22 C21 C26 C25 0.4(5) . . . . ? 

N4 C21 C26 C25 -178.0(3) . . . . ? 

  

loop_ 

 _geom_hbond_atom_site_label_D 

 _geom_hbond_atom_site_label_H 

 _geom_hbond_atom_site_label_A 

 _geom_hbond_distance_DH 

 _geom_hbond_distance_HA 

 _geom_hbond_distance_DA 

 _geom_hbond_angle_DHA 

 _geom_hbond_site_symmetry_A 

N2 H2N N4  0.88 1.95 2.597(3) 128.8 . 

  

_diffrn_measured_fraction_theta_max    0.971 

_diffrn_reflns_theta_full              25.00 

_diffrn_measured_fraction_theta_full   0.971 

_refine_diff_density_max    0.285 

_refine_diff_density_min   -0.346 

_refine_diff_density_rms    0.060 
